# Supplementary material
Source: PubMed Central journal article supplement (PMC2644156)
Supplement: 0812697106_0812697106SI.pdf [file 0812697106_0812697106SI.pdf]

# Supporting Information

Agosta *et al.* 10.1073/pnas.0812697106

Table S1. Neuropsychological testing results for apoE  $\epsilon$ 4 carriers and noncarriers, stratified by diagnostic group

| Subjects (n)                            | AD                 |                    | bvFTD              |                   | Controls           |                    |
|-----------------------------------------|--------------------|--------------------|--------------------|-------------------|--------------------|--------------------|
|                                         | $\epsilon$ 4- (21) | $\epsilon$ 4+ (30) | $\epsilon$ 4- (23) | $\epsilon$ 4+ (8) | $\epsilon$ 4- (46) | $\epsilon$ 4+ (10) |
| <b>Memory</b>                           |                    |                    |                    |                   |                    |                    |
| CVLT-SF, Trial 4 (Correct)              | 4.5 (1.5)          | 4.6 (1.9)          | 4.8 (2.8)          | 4.8 (2.8)         | 8.1 (1.0)          | 8.0 (1.2)          |
| CVLT-SF Long Delay (Free Recall)        | 1.2 (1.3)          | 1.0 (1.8)          | 3.0 (3.1)          | 2.4 (2.1)         | 7.1 (1.8)          | 6.0 (4.2)          |
| CVLT Delayed (Recognition Hits)         | 7.1 (2.2)          | 7.0 (1.8)          | 8.1 (2.1)          | 7.6 (1.8)         | 8.2 (1.6)          | 8.3 (1.5)          |
| CVLT Recognition (False Positives)      | 6.9 (4.7)          | 5.5 (3.0)          | 6.4 (5.6)          | 5.9 (5.4)         | 0.8 (1.5)          | 1.3 (2.5)          |
| Modified Rey-O 10-min recall (0-17)     | 3.0 (3.3)          | 2.1 (3.5)          | 7.2 (5.0)          | 6.7 (5.2)         | 12.9 (3.4)         | 11.9 (3.7)         |
| <b>Visuospatial function</b>            |                    |                    |                    |                   |                    |                    |
| Modified Rey-O Copy (0-17)              | 11.5 (5.0)         | 10.9 (6.3)         | 14.8 (2.9)         | 13.3 (4.5)        | 16.2 (1.0)         | 16.2 (1.0)         |
| <b>Language</b>                         |                    |                    |                    |                   |                    |                    |
| Boston Naming Test (0-15)               | 9.7 (3.5)          | 11.3 (4.0)         | 11.3 (3.6)         | 11.5 (5.1)        | 14.5 (0.8)         | 14.4 (0.7)         |
| Animal Fluency (1 min)                  | 9.1 (3.7)          | 9.4 (4.8)          | 9.7 (7.6)          | 9.0 (5.5)         | 22.1 (5.3)         | 23.0 (7.3)         |
| <b>Executive function</b>               |                    |                    |                    |                   |                    |                    |
| Modified Trails (correct lines per min) | 6.7 (8.4)          | 7.0 (7.2)          | 8.9 (10.1)         | 14.3 (19.5)       | 31.7 (12.2)        | 35.6 (18.9)        |
| Backward Digit Span                     | 3.2 (1.3)          | 3.6 (1.5)          | 3.3 (2.3)          | 4.0 (2.0)         | 5.4 (1.2)          | 5.6 (1.0)          |
| D-word Fluency (1 min)                  | 8.9 (4.7)          | 9.6 (5.6)          | 7.0 (5.3)          | 4.6 (3.6)         | 16.2 (4.6)         | 16.8 (3.9)         |

Data are presented as mean (standard deviation). Comparisons between  $\epsilon$ 4 carriers and noncarriers within each diagnostic group were performed by using Kruskal-Wallis one-way ANOVA. No significant differences were found between  $\epsilon$ 4 carriers and noncarriers in any of the groups.

**Table S2. VBM results of statistical significance of apoE  $\epsilon$ 4 carriers versus controls in each disease group in regions of gray matter that were identified in the contrast carriers vs. both noncarriers and controls**

| Anatomic region (Brodmann area)                                                 |   | x   | y   | z   | AD $\epsilon$ 4+ vs. controls<br>T value    | AD $\epsilon$ 4- vs. controls<br>T value    |
|---------------------------------------------------------------------------------|---|-----|-----|-----|---------------------------------------------|---------------------------------------------|
| Inferior parietal/angular gyrus (39)                                            | R | 38  | -64 | 44  | 6.1                                         | 4.2                                         |
|                                                                                 | L | -34 | -68 | 44  | 5.0                                         | 3.2                                         |
| Inferior parietal/supramarginal gyrus (40)                                      | R | 50  | -40 | 54  | 5.6                                         | 4.7                                         |
|                                                                                 | L | -66 | -30 | 28  | 4.7                                         | 4.3                                         |
| Hippocampus (NA)                                                                | R | 28  | -12 | -14 | 6.0                                         | 3.4                                         |
| Precuneus (7)                                                                   | R | 2   | -56 | 48  | 6.4                                         | 5.5                                         |
| Middle frontal gyrus (46)                                                       | R | 50  | 30  | 34  | 5.6                                         | 5.0                                         |
|                                                                                 |   |     |     |     | bvFTD $\epsilon$ 4+ vs. controls<br>T value | bvFTD $\epsilon$ 4- vs. controls<br>T value |
| Dorsolateral frontal cortex/ inferior frontal gyrus (pars triangularis) (45/46) | R | 48  | 32  | 28  | 7.7                                         | 5.8                                         |
| Inferior frontal gyrus (operculum) (44)                                         | L | -48 | 44  | -6  | 5.2                                         | 3.5                                         |
| Supplementary motor area (6)                                                    | R | 8   | 14  | 50  | 6.9                                         | 3.9                                         |
| Anterior insula (48)                                                            | R | 38  | 20  | 4   | 7.1                                         | 5.2                                         |
|                                                                                 | L | -36 | 16  | 6   | 5.6                                         | 3.2                                         |
| Superior frontal gyrus (8/9)                                                    | R | 18  | 22  | 56  | 6.2                                         | 5.4                                         |
|                                                                                 | L | -20 | 52  | 30  | 4.9                                         | 4.5                                         |
| Middle frontal gyrus (46)                                                       | R | 40  | 40  | 32  | 7.5                                         | 4.5                                         |
|                                                                                 | L | -44 | 48  | 12  | 5.0                                         | 3.3                                         |
| Superior orbitofrontal gyrus (11)                                               | R | 30  | 60  | -4  | 6.7                                         | 5.2                                         |
|                                                                                 | L | -28 | 62  | -4  | 5.3                                         | 4.3                                         |
| Inferior orbitofrontal gyrus (46)                                               | L | -48 | 44  | -6  | 5.2                                         | 3.3                                         |
| Anterior cingulate cortex (32)                                                  | R | 6   | 44  | 24  | 6.3                                         | 4.9                                         |
|                                                                                 | L | -2  | 36  | 36  | 5.8                                         | 4.3                                         |
| Middle cingulate cortex (32)                                                    | R | 8   | 24  | 42  | 6.7                                         | 4.7                                         |
| Superior temporal gyrus (22)                                                    | R | 68  | -38 | -28 | 4.8                                         | 3.3                                         |

The table illustrates how the regions involved in carriers vs. noncarriers are the same but with greater significance and slightly greater extent in the carriers. L, left; R, right; NA, not applicable.
